# Supplementary material
Source: HighWire-hosted journal article supplement (https://www.cmajopen.ca/highwire/filestream/90721/field_highwire_adjunct_files/1/open-2022-0201-2-at.pdf)
Supplement: open-2022-0201-2-at.pdf [file open-2022-0201-2-at.pdf]

## APPENDIX 2. Supplemental tables

**Table S1: Family Physician Characteristics 2005/06, 2012/13 and 2017/18 Ontario & Alberta**

| Characteristic                                                                                                                                                                                                                                                                                                         | ONTARIO          |                  |                  |                  |              | ALBERTA          |                  |                  |                |              |
|------------------------------------------------------------------------------------------------------------------------------------------------------------------------------------------------------------------------------------------------------------------------------------------------------------------------|------------------|------------------|------------------|------------------|--------------|------------------|------------------|------------------|----------------|--------------|
|                                                                                                                                                                                                                                                                                                                        | 2005/06          | 2012/13          | 2017/18          | Change           |              | 2005/06          | 2012/13          | 2017/18          | Change         |              |
|                                                                                                                                                                                                                                                                                                                        |                  |                  |                  | 05/06 – 17/18    |              |                  |                  |                  | 05/06 – 17/18  |              |
|                                                                                                                                                                                                                                                                                                                        |                  |                  |                  | N                | %            |                  |                  |                  | N              | %            |
| N                                                                                                                                                                                                                                                                                                                      | 8,858            | 10,358           | 11,987           | <u>3,129</u>     | <u>35.3</u>  | 2,716            | 3,238            | 4,038            | <u>1,322</u>   | <u>48.7</u>  |
| Census Population                                                                                                                                                                                                                                                                                                      | 12,528,663       | 13,390,632       | 14,070,141       | <u>1,541,478</u> | <u>12.3</u>  | 3,321,768        | 3,874,548        | 4,241,100        | <u>919,332</u> | <u>27.7</u>  |
| Number of physicians per 10,000 population                                                                                                                                                                                                                                                                             | 7.1              | 7.7              | 8.5              | <u>1.4</u>       | <u>19.7</u>  | 8.2              | 8.4              | 9.5              | <u>1</u>       | <u>16.4</u>  |
| Male (%)                                                                                                                                                                                                                                                                                                               | 5,723<br>(64.6%) | 5,958<br>(57.5%) | 6,328<br>(52.8%) | <u>605</u>       | <u>10.5</u>  | 1,713<br>(63.1%) | 1,979<br>(61.1%) | 2,305<br>(57.1%) | <u>592</u>     | <u>34.6</u>  |
| Female (%)                                                                                                                                                                                                                                                                                                             | 3,135<br>(35.4%) | 4,400<br>(42.5%) | 5,659<br>(47.2%) | <u>2,524</u>     | <u>80.5</u>  | 1,003<br>(36.9%) | 1,259<br>(38.9%) | 1,733<br>(42.9%) | <u>730</u>     | <u>72.8</u>  |
| Years Since Medical School Graduation (N (%))                                                                                                                                                                                                                                                                          |                  |                  |                  |                  |              |                  |                  |                  |                |              |
| 0-9 yrs (%)                                                                                                                                                                                                                                                                                                            | 1,122<br>(12.7%) | 1,660<br>(16.0%) | 2,840<br>(23.7%) | <u>1,718</u>     | <u>153.1</u> | 478<br>(17.6%)   | 508<br>(15.7%)   | 809<br>(20.0%)   | <u>331</u>     | <u>69.2</u>  |
| 10-19 yrs (%)                                                                                                                                                                                                                                                                                                          | 2,461<br>(27.8%) | 2,065<br>(19.9%) | 2,273<br>(19.0%) | <u>-188</u>      | <u>-7.6</u>  | 787<br>(29.0%)   | 839<br>(25.9%)   | 1,098<br>(27.2%) | <u>311</u>     | <u>39.5</u>  |
| 20-29 yrs (%)                                                                                                                                                                                                                                                                                                          | 2,679<br>(30.2%) | 2,930<br>(28.3%) | 2,730<br>(22.8%) | <u>51</u>        | <u>1.9</u>   | 766<br>(28.2%)   | 853<br>(26.3%)   | 975<br>(24.1%)   | <u>209</u>     | <u>27.3</u>  |
| 30+ yrs (%)                                                                                                                                                                                                                                                                                                            | 2,596<br>(29.3%) | 3,703<br>(35.8%) | 4,144<br>(34.6%) | <u>1,548</u>     | <u>59.6</u>  | 685<br>(25.2%)   | 1,038<br>(32.1%) | 1,156<br>(28.6%) | <u>471</u>     | <u>68.8</u>  |
| International Medical Graduate*                                                                                                                                                                                                                                                                                        | -                | -                | -                |                  |              | 984<br>(36.2%)   | 1,456<br>(45.0%) | 1,968<br>(48.7%) | <u>984</u>     | <u>100.0</u> |
| <p><a href="#">Population estimates taken from StatsCan Table 17-10-0005-01 (Population estimates on July 1st, by age and sex (statcan.gc.ca)) for years 2005, 2012, 2017.</a></p> <p>*<u>Complete</u> data from Ontario on International Medical Graduates was not available for analysis for the years examined.</p> |                  |                  |                  |                  |              |                  |                  |                  |                |              |

| <b>Table S2: Average Service Days by Sex and Years Since Medical School Graduation</b> |                |                |                |                                                         |               |                |                |                |                                                         |               |
|----------------------------------------------------------------------------------------|----------------|----------------|----------------|---------------------------------------------------------|---------------|----------------|----------------|----------------|---------------------------------------------------------|---------------|
| <b>Ontario</b>                                                                         |                |                |                |                                                         |               |                |                |                |                                                         |               |
| <b>Female</b>                                                                          |                |                |                |                                                         |               | <b>Male</b>    |                |                |                                                         |               |
| <b>Years Since Graduation</b>                                                          | <b>2005/06</b> | <b>2012/13</b> | <b>2017/18</b> | <b>Change in Average Service Days 2005/06 – 2017/18</b> |               | <b>2005/06</b> | <b>2012/13</b> | <b>2017/18</b> | <b>Change in Average Service Days 2005/06 – 2017/18</b> |               |
|                                                                                        |                |                |                | <b>N</b>                                                | <b>%</b>      |                |                |                | <b>N</b>                                                | <b>%</b>      |
| 0-9                                                                                    | 125.5          | 113            | 120.1          | -5.4                                                    | -4.30%        | 168.9          | 141.5          | 151.5          | -17.4                                                   | -10.30%       |
| 10-19                                                                                  | 150.6          | 139.1          | 137.3          | -13.3                                                   | -8.80%        | 189.2          | 169.1          | 165.8          | -23.4                                                   | -12.40%       |
| 20-29                                                                                  | 160.5          | 147.7          | 153.6          | -6.9                                                    | -4.30%        | 195.4          | 175.7          | 178.3          | -17.1                                                   | -8.80%        |
| 30+                                                                                    | 159.3          | 146.4          | 143            | -16.3                                                   | -10.20%       | 172            | 165.7          | 164.5          | -7.5                                                    | -4.40%        |
| <b>Total</b>                                                                           | <b>149.6</b>   | <b>136.9</b>   | <b>137.1</b>   | <b>-12.5</b>                                            | <b>-8.40%</b> | <b>182.7</b>   | <b>166.3</b>   | <b>165.2</b>   | <b>-17.5</b>                                            | <b>-9.60%</b> |
| <b>Alberta</b>                                                                         |                |                |                |                                                         |               |                |                |                |                                                         |               |
| <b>Female</b>                                                                          |                |                |                |                                                         |               | <b>Male</b>    |                |                |                                                         |               |
| <b>Years Since Graduation</b>                                                          | <b>2005/06</b> | <b>2012/13</b> | <b>2017/18</b> | <b>Change in Average Service Days 2005/06 – 2017/18</b> |               | <b>2005/06</b> | <b>2012/13</b> | <b>2017/18</b> | <b>Change in Average Service Days 2005/06 – 2017/18</b> |               |
|                                                                                        |                |                |                | <b>N</b>                                                | <b>%</b>      |                |                |                | <b>N</b>                                                | <b>%</b>      |
| 0-9                                                                                    | 107.5          | 100.0          | 103.4          | -4.2                                                    | -3.9%         | 144.4          | 123.2          | 133.9          | -10.5                                                   | -7.3%         |
| 10-19                                                                                  | 120.2          | 111.5          | 129.1          | 8.8                                                     | 7.4%          | 162.8          | 149.1          | 172.6          | 9.8                                                     | 6.0%          |
| 20-29                                                                                  | 139.2          | 124.6          | 137.1          | -2.1                                                    | -1.5%         | 170.8          | 157.3          | 171.7          | 0.9                                                     | 0.5%          |
| 30+                                                                                    | 150.4          | 120.9          | 115.5          | -34.9                                                   | -23.2%        | 160.0          | 143.7          | 147.6          | -12.4                                                   | -7.8%         |
| <b>Total</b>                                                                           | <b>126.3</b>   | <b>115.2</b>   | <b>122.2</b>   | <b>-4.2</b>                                             | <b>-3.3%</b>  | <b>161.8</b>   | <b>145.6</b>   | <b>157.0</b>   | <b>-4.8</b>                                             | <b>-2.9%</b>  |

Appendix 2, as supplied by the authors. Appendix to McDonald T, Schultz SE, Green LA, et al. Family physician count and service provision in Ontario and Alberta between 2005/06 and 2017/18: a cross-sectional study. *CMAJ Open* 2023.  
 DOI:10.9778/cmajo.20220201. Copyright © 2023 The Author(s) or their employer(s). To receive this resource in an accessible format, please contact us at [cmajgroup.cmaj.ca](mailto:cmajgroup.cmaj.ca).

| <b>Table S3: Mean Annual Service Days and Average Daily Patient Visit Volume 2005/06, 2012/13 and 2017/18<br/>Ontario &amp; Alberta</b> |                |              |              |                |              |              |
|-----------------------------------------------------------------------------------------------------------------------------------------|----------------|--------------|--------------|----------------|--------------|--------------|
|                                                                                                                                         | <b>ONTARIO</b> |              |              | <b>ALBERTA</b> |              |              |
|                                                                                                                                         | 2005/06        | 2012/13      | 2017/18      | 2005/06        | 2012/13      | 2017/18      |
| <b>Service Days (mean ± sd)</b>                                                                                                         |                |              |              |                |              |              |
| Service Days with 10 patients seen per day minimum                                                                                      | 170.7 ± 71.7   | 153.9 ± 65.5 | 152.6 ± 67.7 | 157.0 ± 75.2   | 140.8 ± 74.6 | 147.8 ± 76.7 |
| Average Service Days per week with 10 patients seen per day minimum                                                                     | 3.7 ± 1.6      | 3.4 ± 1.4    | 3.3 ± 1.5    | 3.9 ± 1.4      | 3.7 ± 1.4    | 3.7 ± 1.5    |
| <b>Average Daily Patient Visit Volume (mean ± sd)</b>                                                                                   |                |              |              |                |              |              |
| Average Daily Patient Visit Volume, Days With 10 or More Patients                                                                       | 24.4 ± 9.8     | 24.8 ± 12.9  | 23.3 ± 12.1  | 29.0 ± 14.5    | 28.0 ± 14.5  | 25.7 ± 13.0  |
| Average Daily Patient Volume, Any Day With At Least 1 visit                                                                             | 21.6 ± 10.2    | 21.3 ± 11.6  | 20.1 ± 11.3  | 26.1 ± 15.8    | 24.2 ± 15.9  | 22.6 ± 14.1  |
| <b>Total Number of Patient Visits/Services</b>                                                                                          |                |              |              |                |              |              |
| Total Number of Patient Visits/Services, All Physicians Combined                                                                        | 41,984,217     | 45,042,068   | 49,168,825   | 12,806,317     | 13,808,231   | 17,728,099   |
| Visits/Services Per Population (See Table S1 for population)                                                                            | 3.4            | 3.4          | 3.5          | 3.9            | 3.6          | 4.2          |

| <b>Table S4: Family Physician Total Count and Average Service Day by Geography - Alberta</b> |              |              |              |                             |               |                                                        |             |             |                             |               |
|----------------------------------------------------------------------------------------------|--------------|--------------|--------------|-----------------------------|---------------|--------------------------------------------------------|-------------|-------------|-----------------------------|---------------|
| <b>Total FP Counts</b>                                                                       |              |              |              |                             |               | <b>Average Service Day (10 patient minimum) per FP</b> |             |             |                             |               |
|                                                                                              | 2005/<br>06  | 2012/<br>13  | 2017/<br>18  | Change 2005/06 –<br>2017/18 |               | 2005/<br>06                                            | 2012/<br>13 | 2017/<br>18 | Change 2005/06<br>– 2017/18 |               |
|                                                                                              |              |              |              | N                           | %             |                                                        |             |             | N                           | %             |
| Metro (500K+)                                                                                | 1,499        | 1,689        | 2,235        | 736                         | 49.10%        | 149                                                    | 139         | 151         | 2                           | 1.07%         |
| Mod. Metro Influence (100k-500k)                                                             | 260          | 411          | 519          | 259                         | 99.62%        | 163                                                    | 143         | 152         | -11                         | -6.57%        |
| Urban 25k-100k                                                                               | 254          | 324          | 380          | 126                         | 49.61%        | 172                                                    | 145         | 144         | -28                         | -16.36%       |
| Mod. Urban Influence                                                                         | 24           | 33           | 32           | 8                           | 33.33%        | 173                                                    | 159         | 150         | -22                         | -12.99%       |
| Rural Centre (10K - < 25K)                                                                   | 126          | 145          | 155          | 29                          | 23.02%        | 136                                                    | 121         | 128         | -8                          | -5.60%        |
| Rural (<10K)                                                                                 | 450          | 520          | 595          | 145                         | 32.22%        | 137                                                    | 113         | 114         | -22                         | -16.39%       |
| Rural Remote                                                                                 | 84           | 94           | 94           | 10                          | 11.90%        | 133                                                    | 105         | 93          | -40                         | -30.04%       |
| Missing                                                                                      | 19           | 22           | 28           | 9                           | 47.37%        | 39                                                     | 48          | 83          | 43                          | 109.73%       |
| <b>Total</b>                                                                                 | <b>2,716</b> | <b>3,238</b> | <b>4,038</b> | <b>1,322</b>                | <b>48.67%</b> | <b>149</b>                                             | <b>134</b>  | <b>142</b>  | <b>-7</b>                   | <b>-4.47%</b> |

**Table S5: Total Family Physician Count and Average Service Day by Geography - Ontario**

|                                                | Total FP Counts |         |         |                          |        | Average Service Days 10 Patient Minimum Per FP |         |         |                          |        |
|------------------------------------------------|-----------------|---------|---------|--------------------------|--------|------------------------------------------------|---------|---------|--------------------------|--------|
|                                                | 2005/06         | 2012/13 | 2017/18 | Change 2005/06 – 2017/18 |        | 2005/06                                        | 2012/13 | 2017/18 | Change 2005/06 – 2017/18 |        |
|                                                |                 |         |         | N                        | %      |                                                |         |         | N                        | %      |
| 1.5M+                                          | 3,785           | 4,516   | 5298    | 1,513                    | +40.0% | 180                                            | 165     | 163     | -17                      | -9.4%  |
| 500K- <1.5M                                    | 1,546           | 1,840   | 2108    | 562                      | +36.4% | 153                                            | 141     | 141     | -12                      | -7.8 % |
| 100K - <500K                                   | 1,793           | 2,071   | 2370    | 577                      | +32.2% | 176                                            | 155     | 153     | -23                      | -      |
| 10K - < 100K                                   | 685             | 832     | 980     | 295                      | +43.1% | 167                                            | 142     | 138     | -29                      | 17.4%  |
| NonCMACA <sup>1</sup> /Strong MIZ <sup>2</sup> | 238             | 275     | 328     | 90                       | +37.8% | 176                                            | 145     | 135     | -41                      | -      |
| NonCMACA/Mod MIZ                               | 317             | 360     | 389     | 72                       | +22.7% | 154                                            | 133     | 130     | -24                      | 15.6%  |
| NonCMACA/Weak MIZ                              | 227             | 225     | 274     | 47                       | +20.7% | 124                                            | 112     | 101     | -23                      | -      |
| Missing                                        | -               | -       | -       | -                        | -      | 168                                            | 148     | 140     | -28                      | 16.7%  |
| TOTAL                                          | 8,591           | 10,119  | 11,747  | 3,156                    | +36.7% | 171                                            | 153     | 153     | -18                      | -      |

1. CMACA – census metropolitan area / census agglomerations 2. MIZ – census metropolitan influenced zone (See Appendix) (8).
